# Supplementary material for: Lewis acid promoted intramolecular (3 + 2) ‘cycloadditions’ of methyleneaziridines with alkene and alkyne acceptors
Source: Royal Society of Chemistry journal article supplement (doi:10.1039/c1ob06578e), 2011-10-26

## Lewis Acid Promoted Intramolecular (3+2) ‘Cycloadditions’ of Methyleneaziridines with Alkene and Alkyne Acceptors

Karen Griffin, Cyril Montagne, Cam Thuy Hoang, Guy J. Clarkson and Michael Shipman\*

Department of Chemistry, University of Warwick  
Gibbet Hill Road, Coventry, CV4 7AL, UK.  
Fax: +44 2476 524112; Tel: +44 2476 523186  
E-mail: m.shipman@warwick.ac.uk

### Supporting information

|                                                                           | pages |
|---------------------------------------------------------------------------|-------|
| <sup>1</sup> H and <sup>13</sup> C NMR spectra of ( <i>E</i> )- <b>6</b>  | S2    |
| <sup>1</sup> H and <sup>13</sup> C NMR spectra of ( <i>Z</i> )- <b>6</b>  | S3    |
| <sup>1</sup> H and <sup>13</sup> C NMR spectra of <b>7</b>                | S4    |
| <sup>1</sup> H and <sup>13</sup> C NMR spectra of ( <i>E</i> )- <b>8</b>  | S5    |
| <sup>1</sup> H and <sup>13</sup> C NMR spectra of ( <i>E</i> )- <b>9</b>  | S6    |
| <sup>1</sup> H and <sup>13</sup> C NMR spectra of <b>10</b>               | S7    |
| <sup>1</sup> H and <sup>13</sup> C NMR spectra of <b>11</b>               | S8    |
| <sup>1</sup> H and <sup>13</sup> C NMR spectra of ( <i>Z</i> )- <b>12</b> | S9    |
| <sup>1</sup> H and <sup>13</sup> C NMR spectra of <b>19</b>               | S10   |
| <sup>1</sup> H and <sup>13</sup> C NMR spectra of <b>20</b>               | S11   |
| <sup>1</sup> H and <sup>13</sup> C NMR spectra of <b>21</b>               | S12   |
| <sup>1</sup> H and <sup>13</sup> C NMR spectra of <b>22</b>               | S13   |
| <sup>1</sup> H and <sup>13</sup> C NMR spectra of <b>23</b> and <b>24</b> | S14   |
| <sup>1</sup> H and <sup>13</sup> C NMR spectra of <b>26</b>               | S15   |
| <sup>1</sup> H and <sup>13</sup> C NMR spectra of <b>27</b>               | S16   |
| <sup>1</sup> H and <sup>13</sup> C NMR spectra of <b>31</b>               | S17   |

### Compound (E)-6

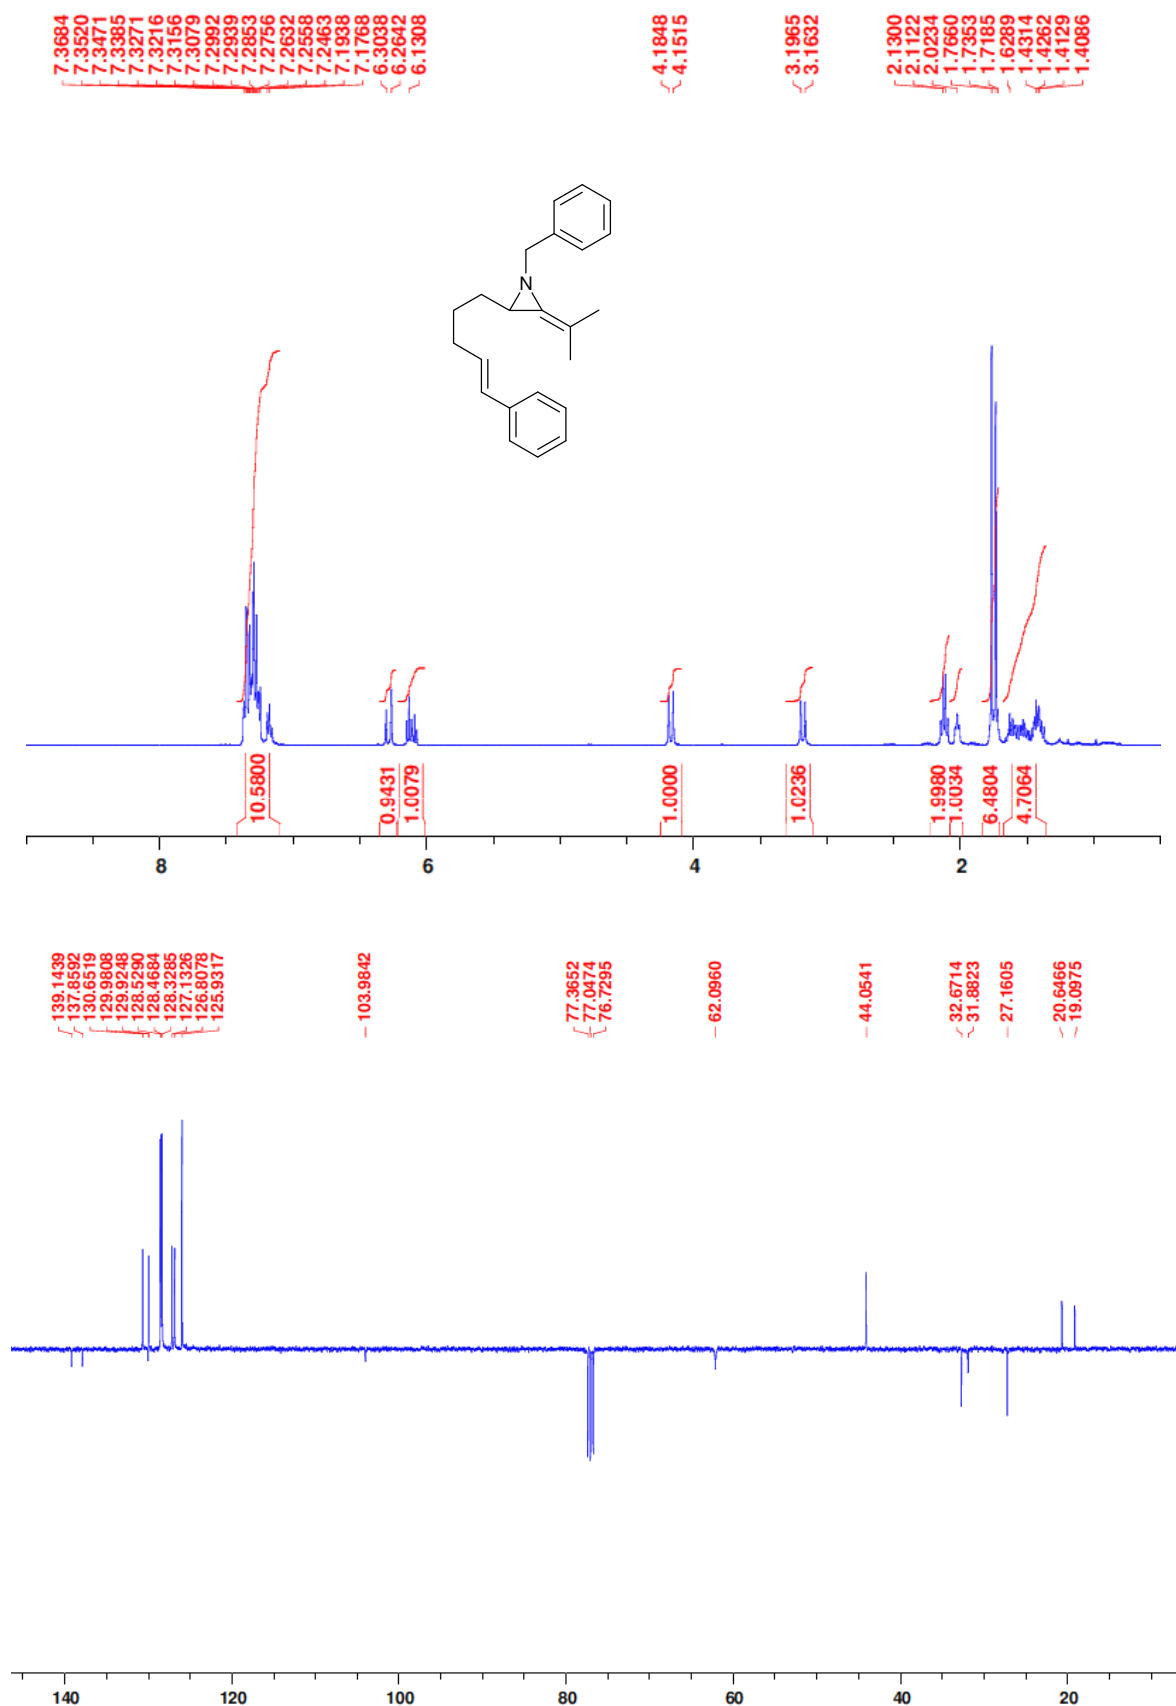

### Compound (Z)-6

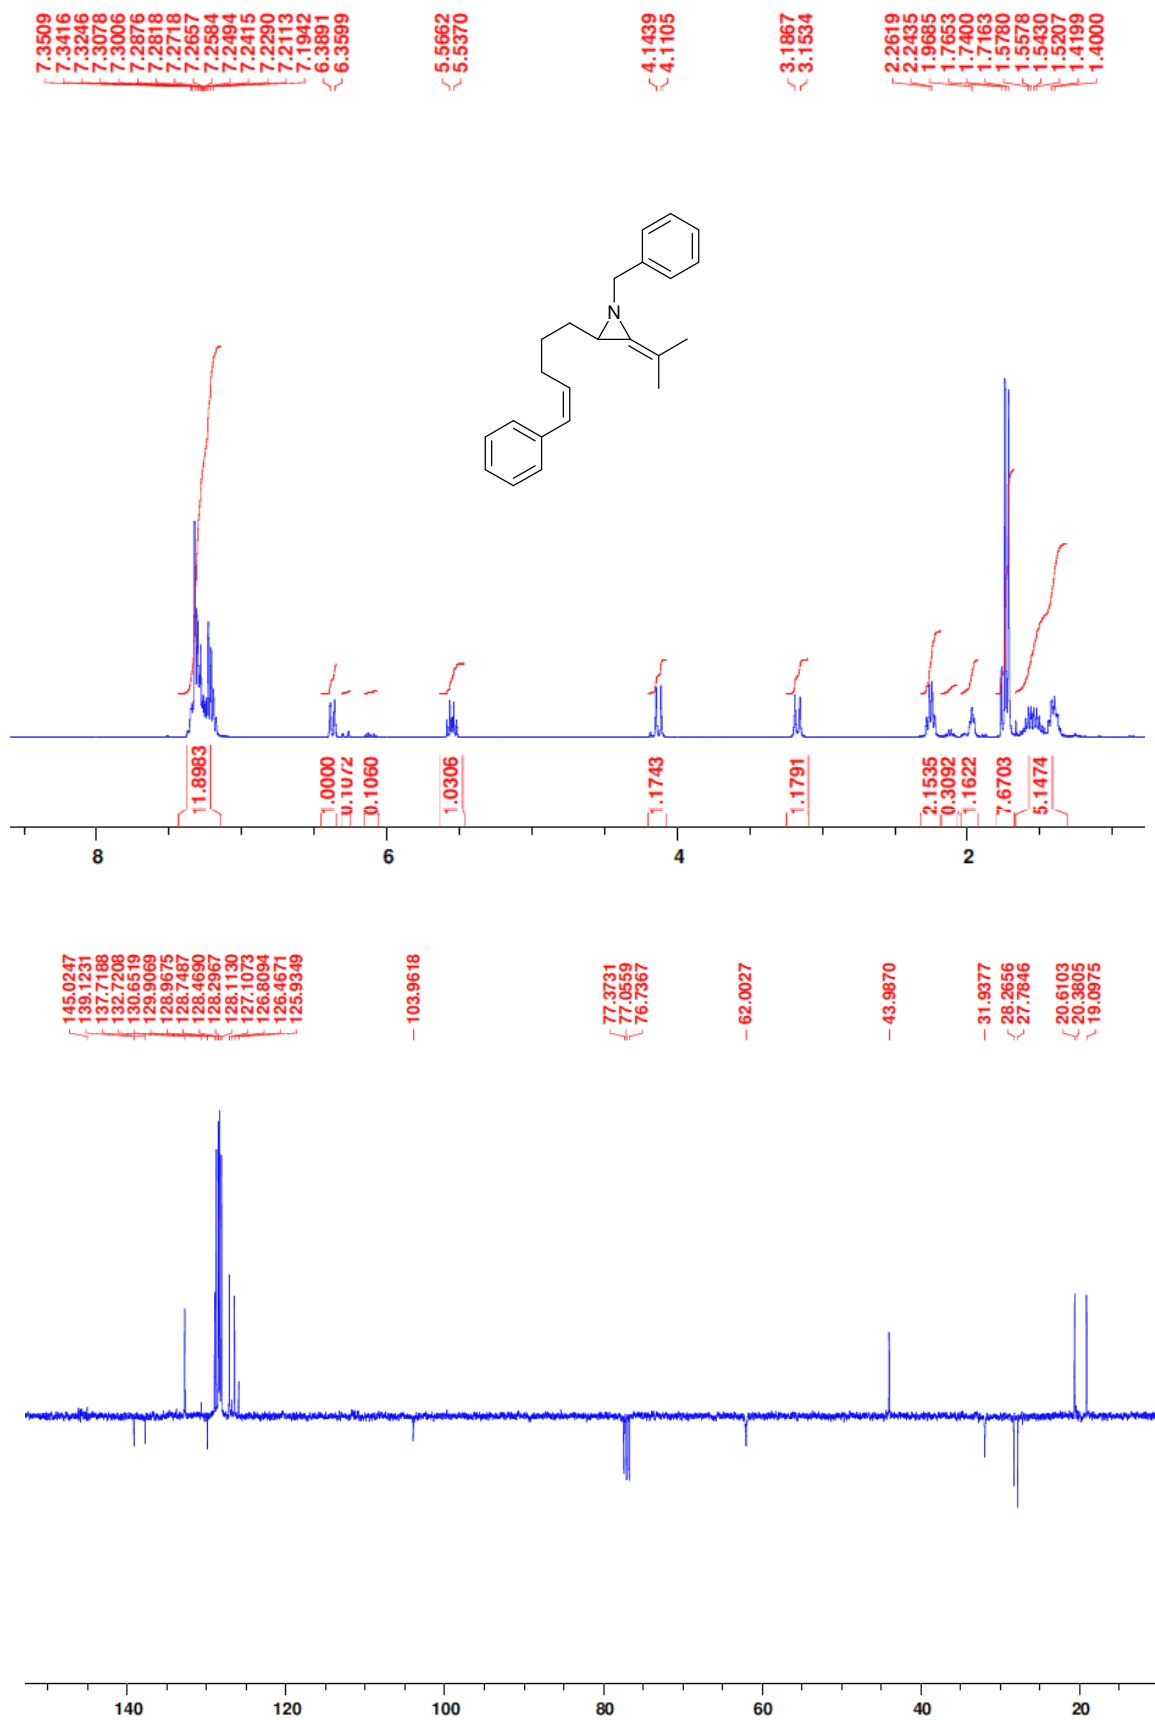

### Compound 7

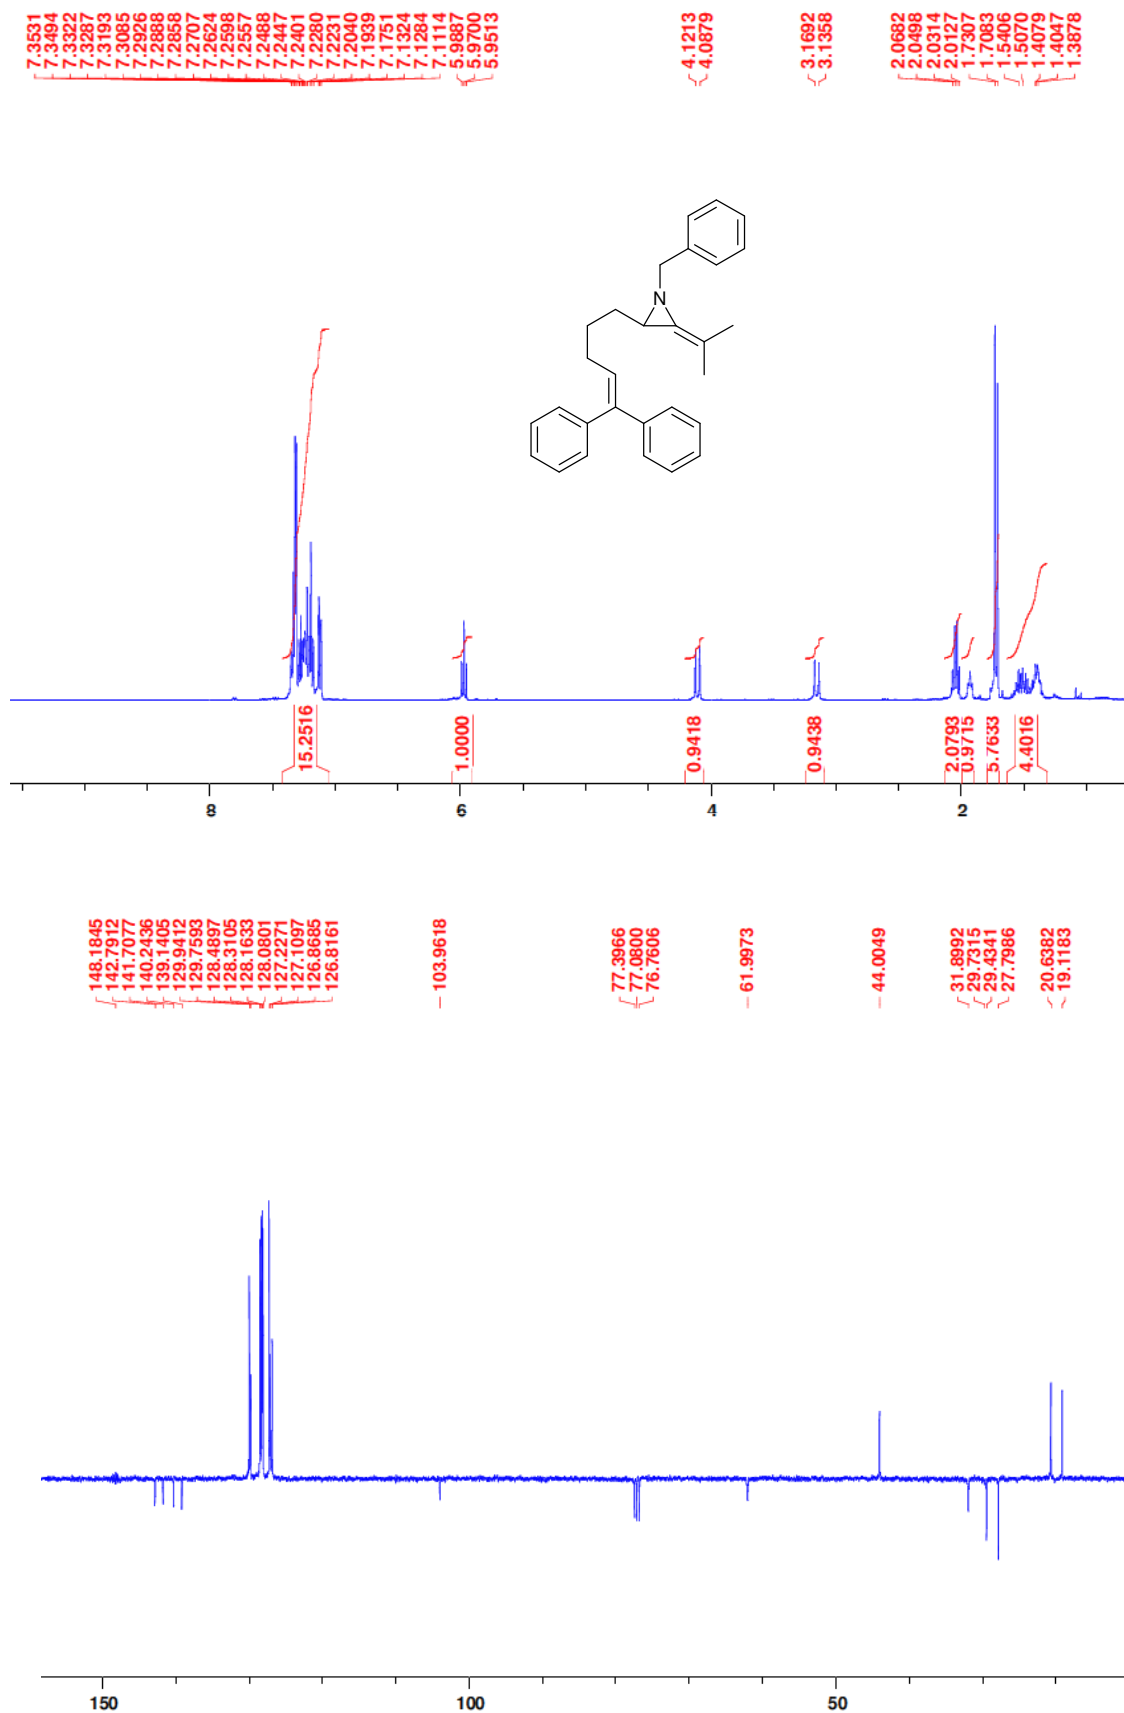

### Compound (E)-8

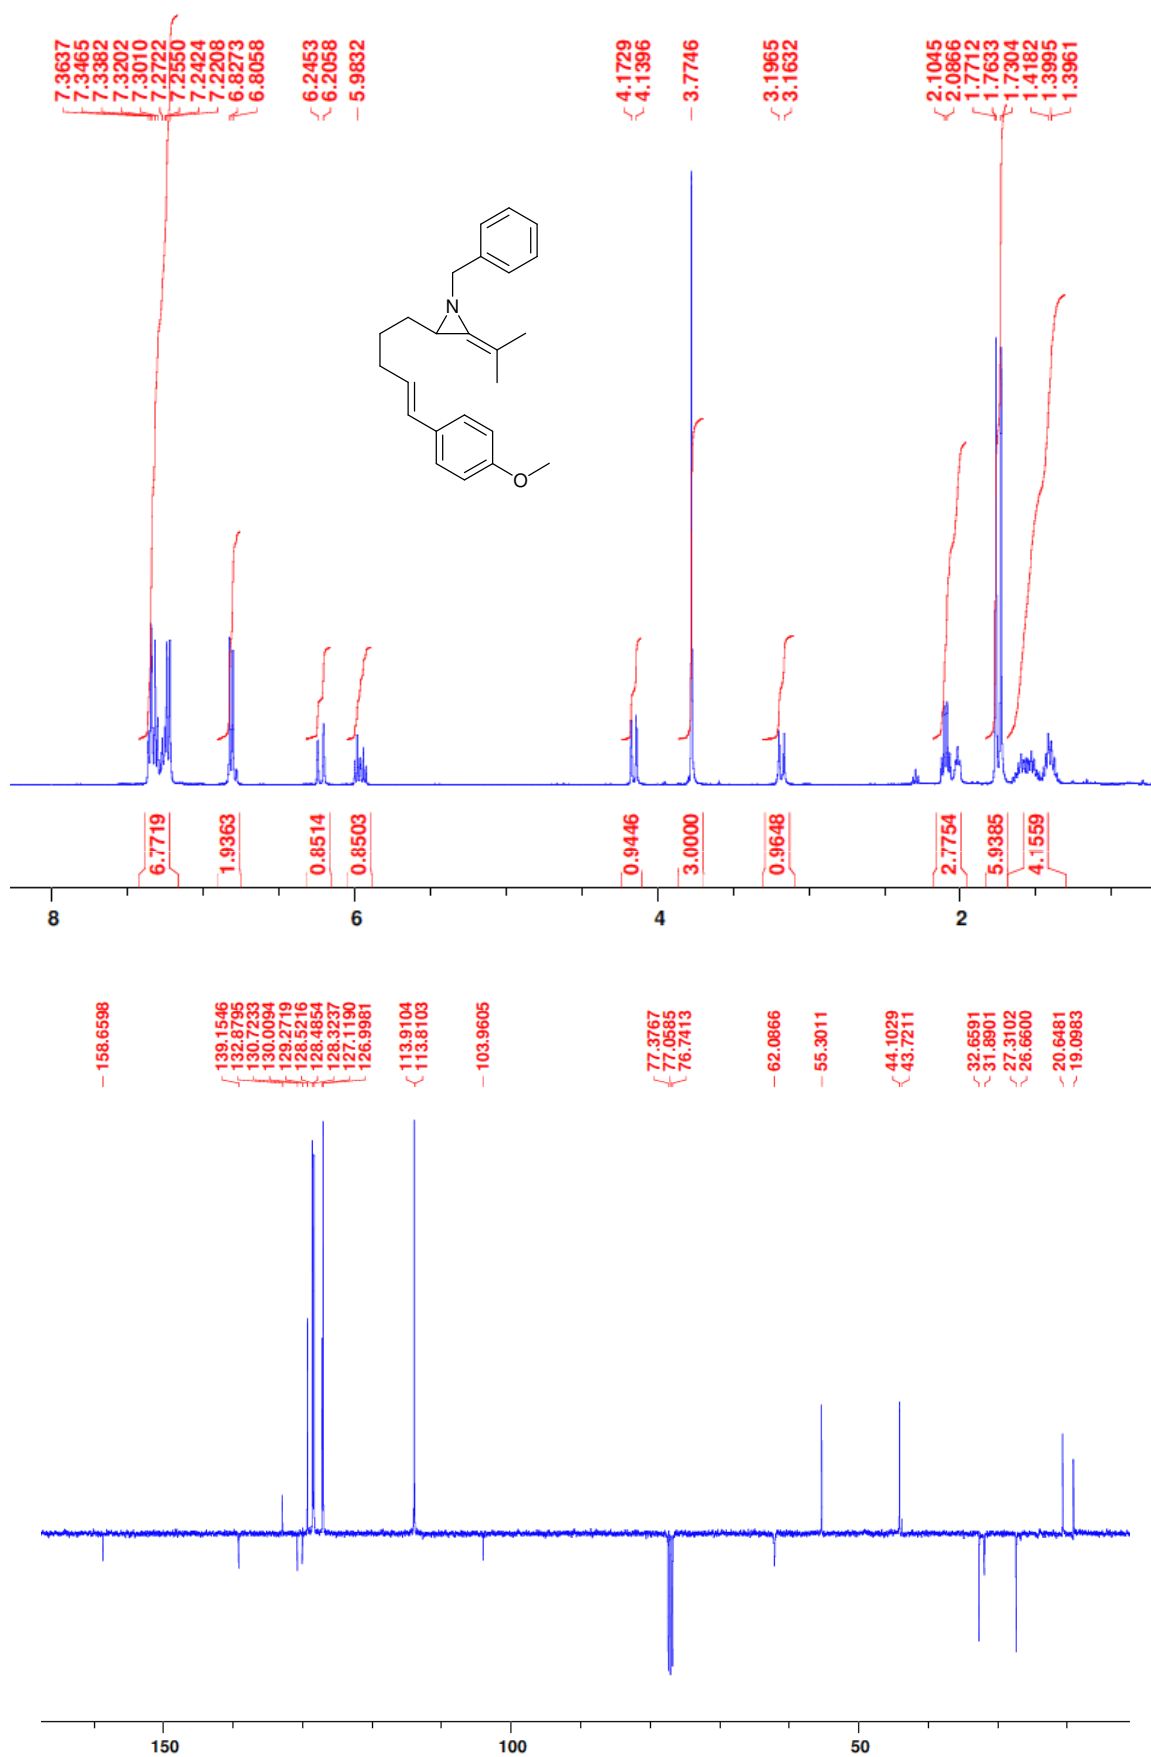

### Compound (E)-9

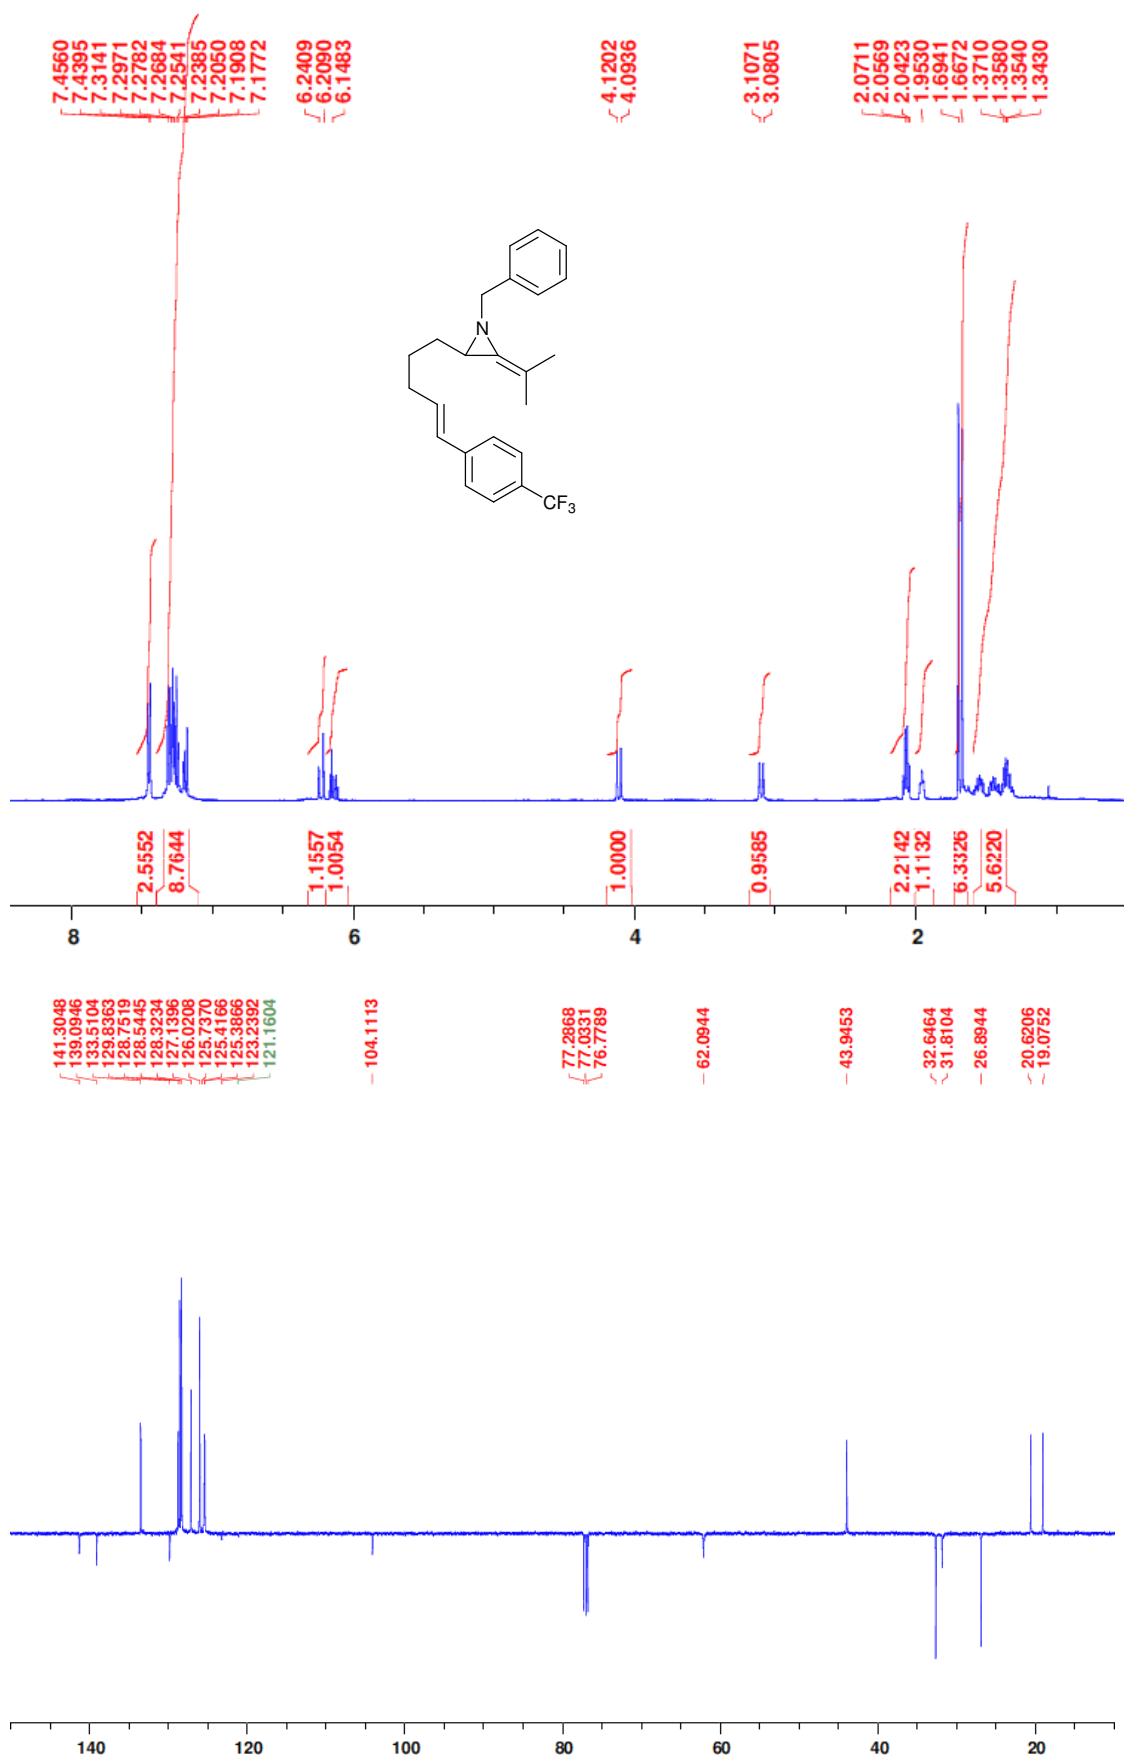

### Compound 10

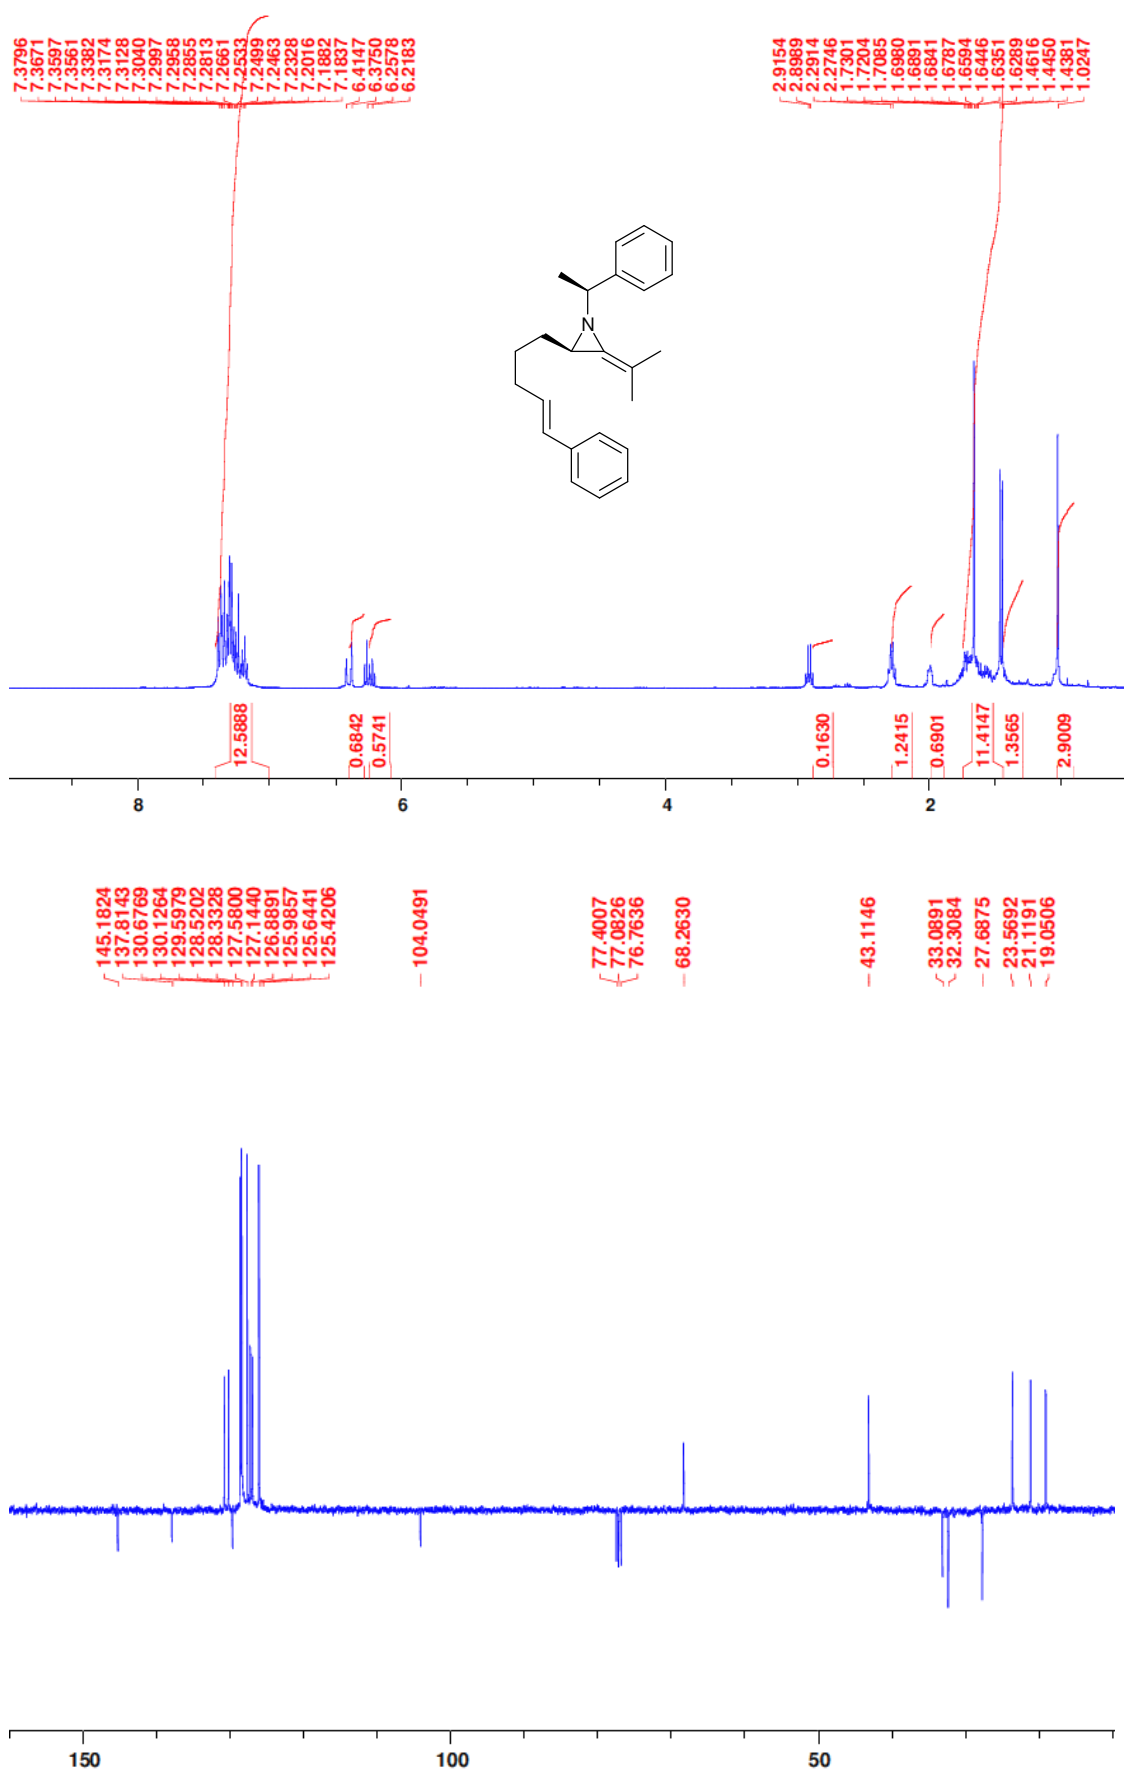

### Compound 11

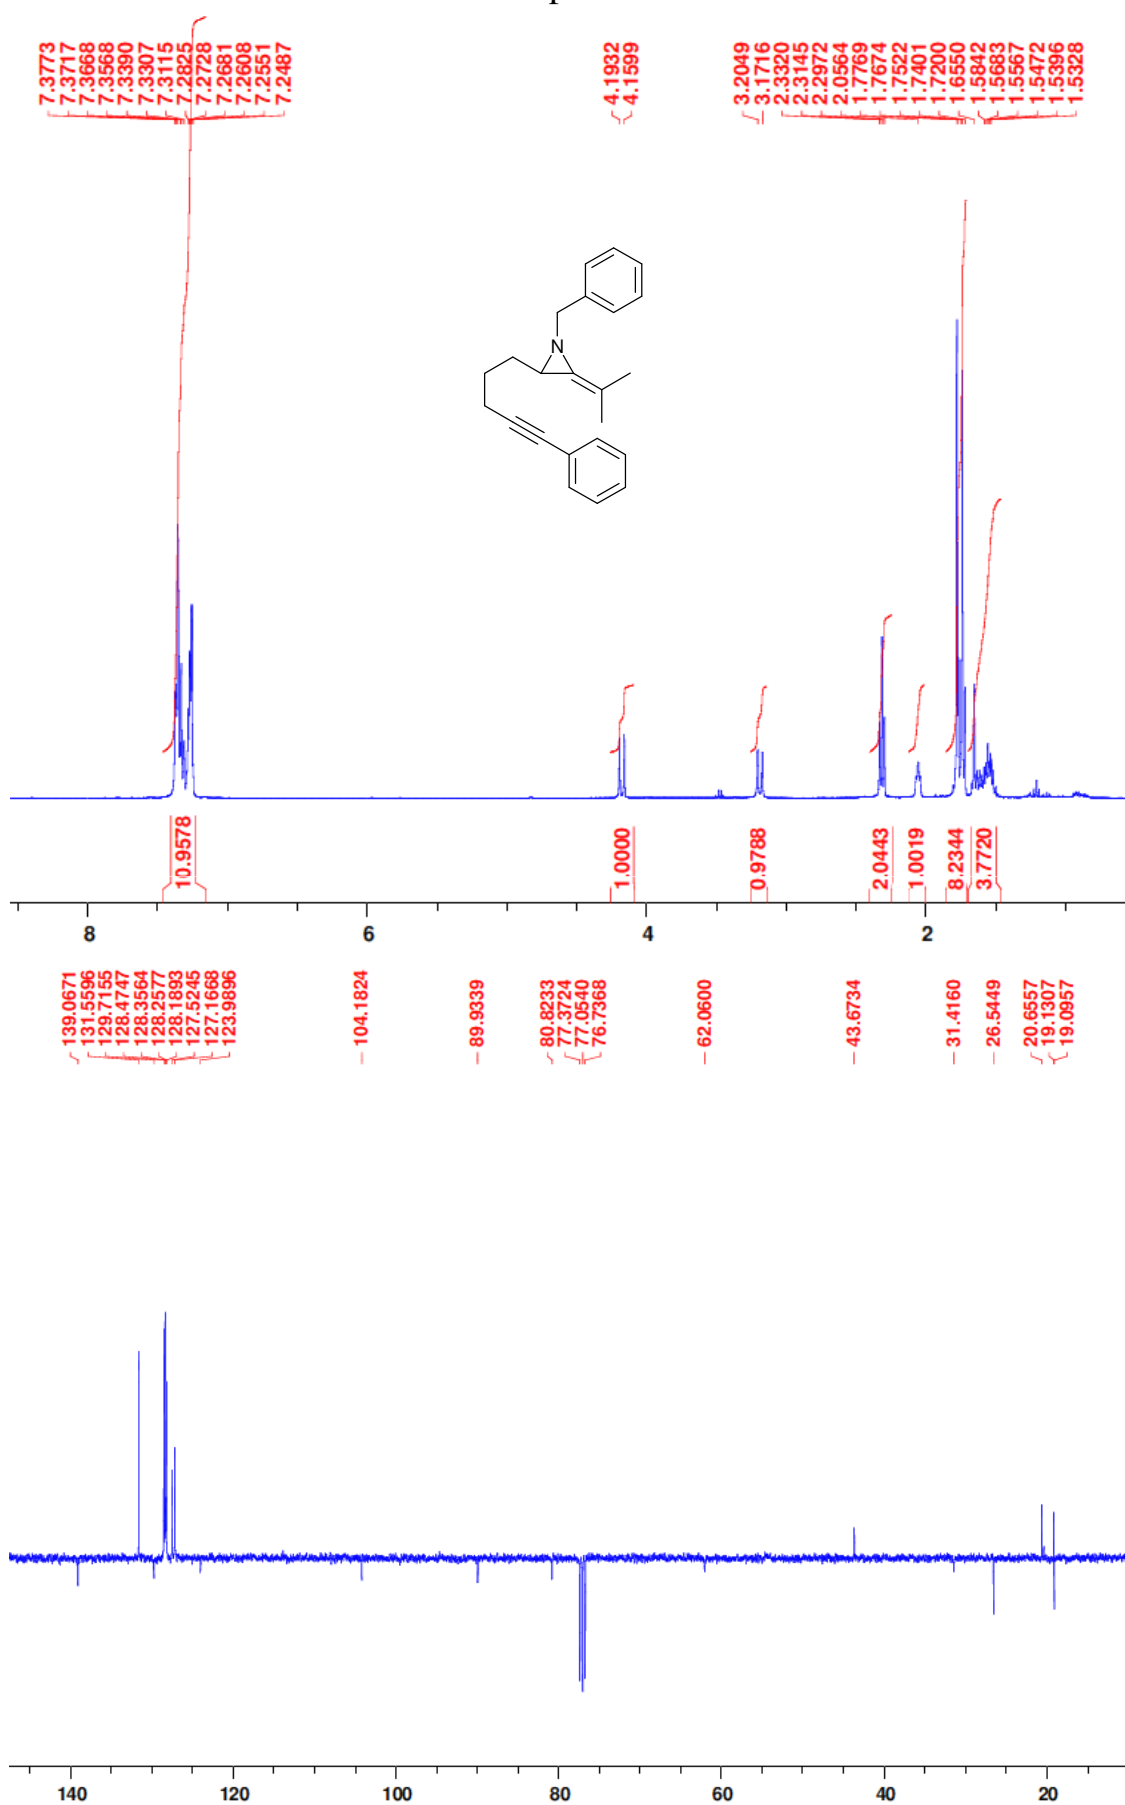



### Compound (Z)-12

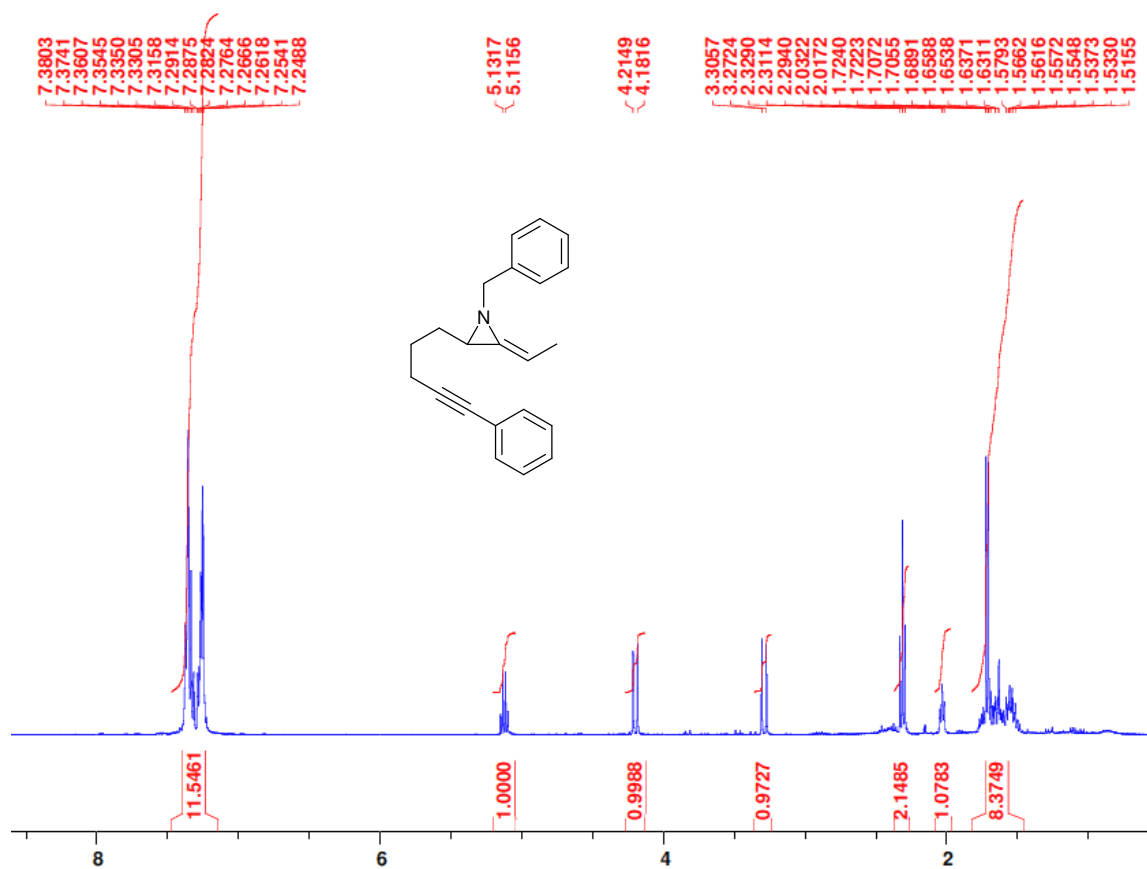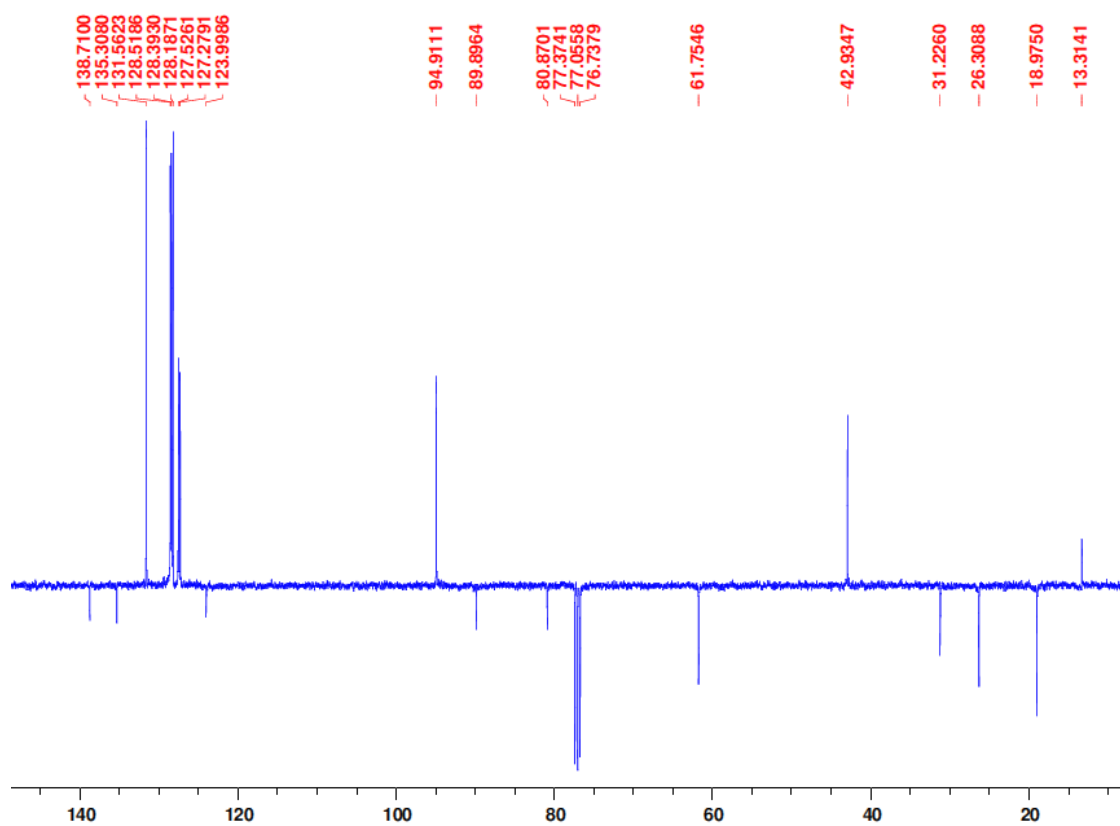

### Compound 19

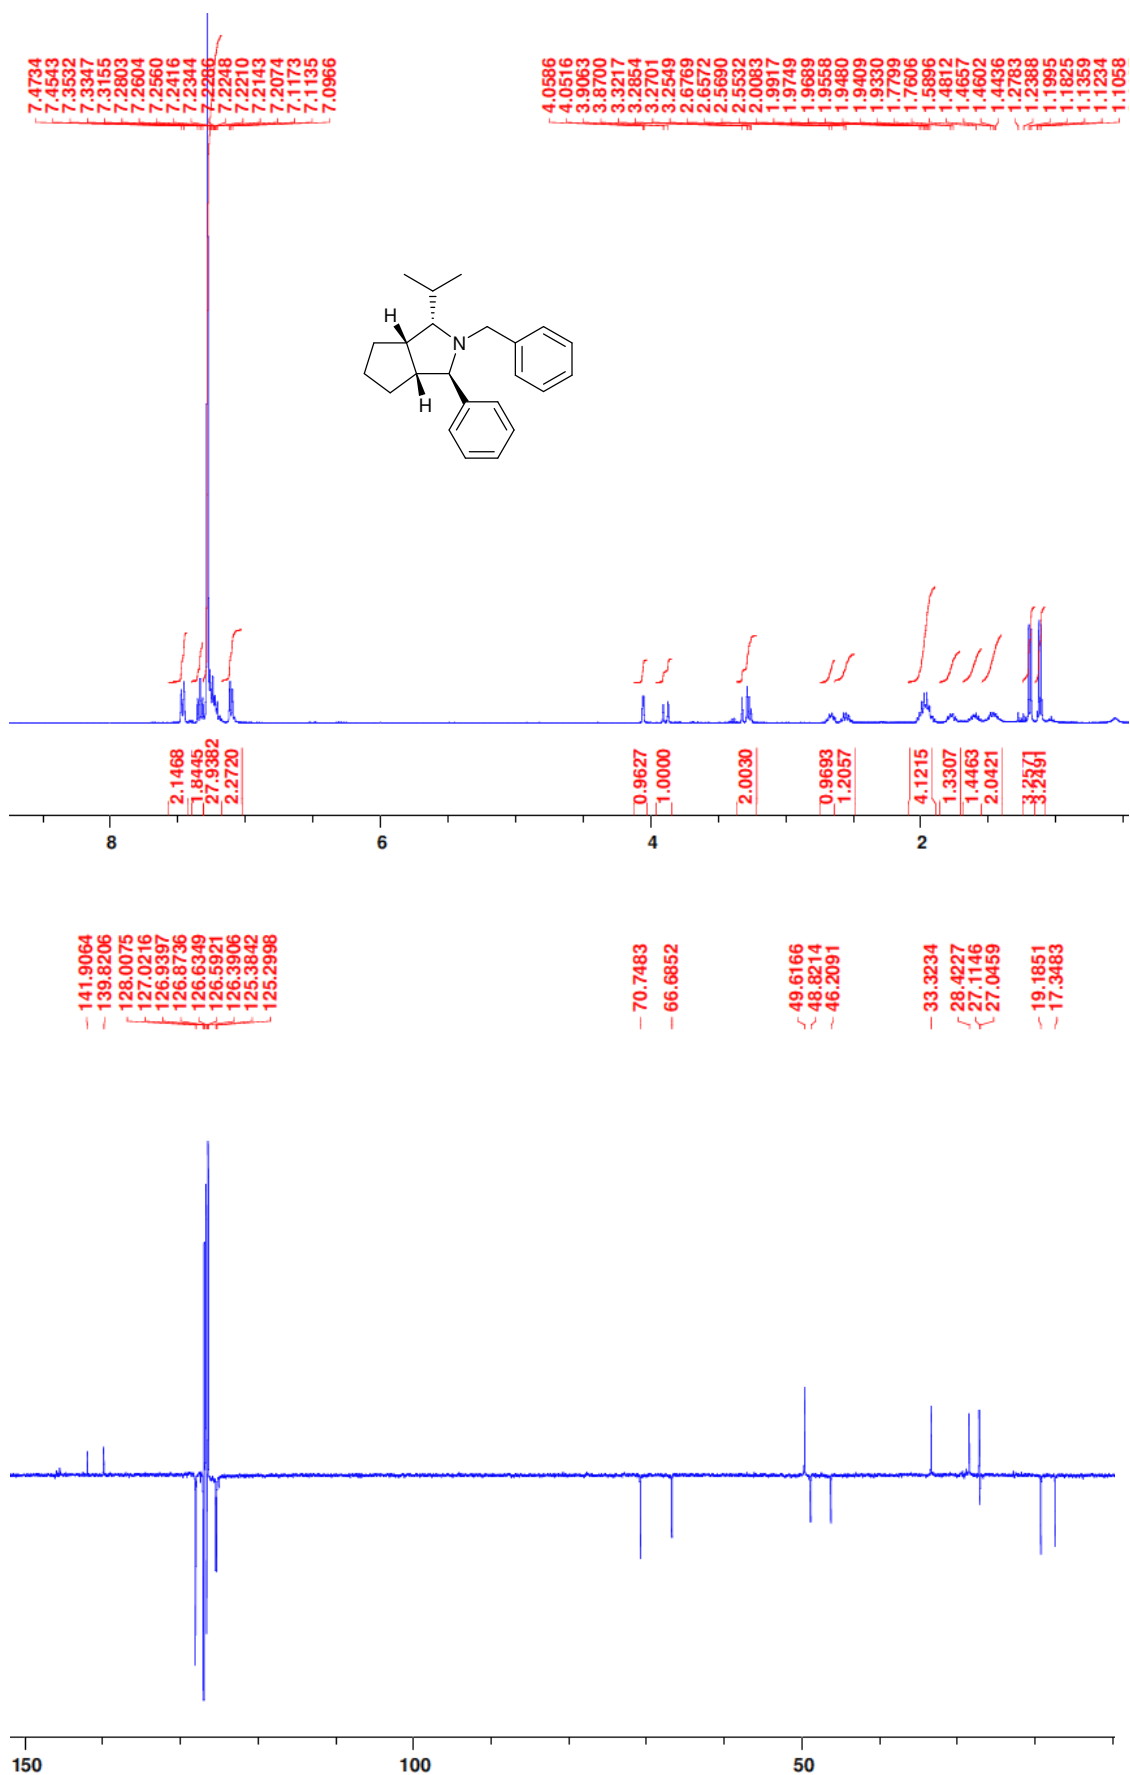

### Compound 20

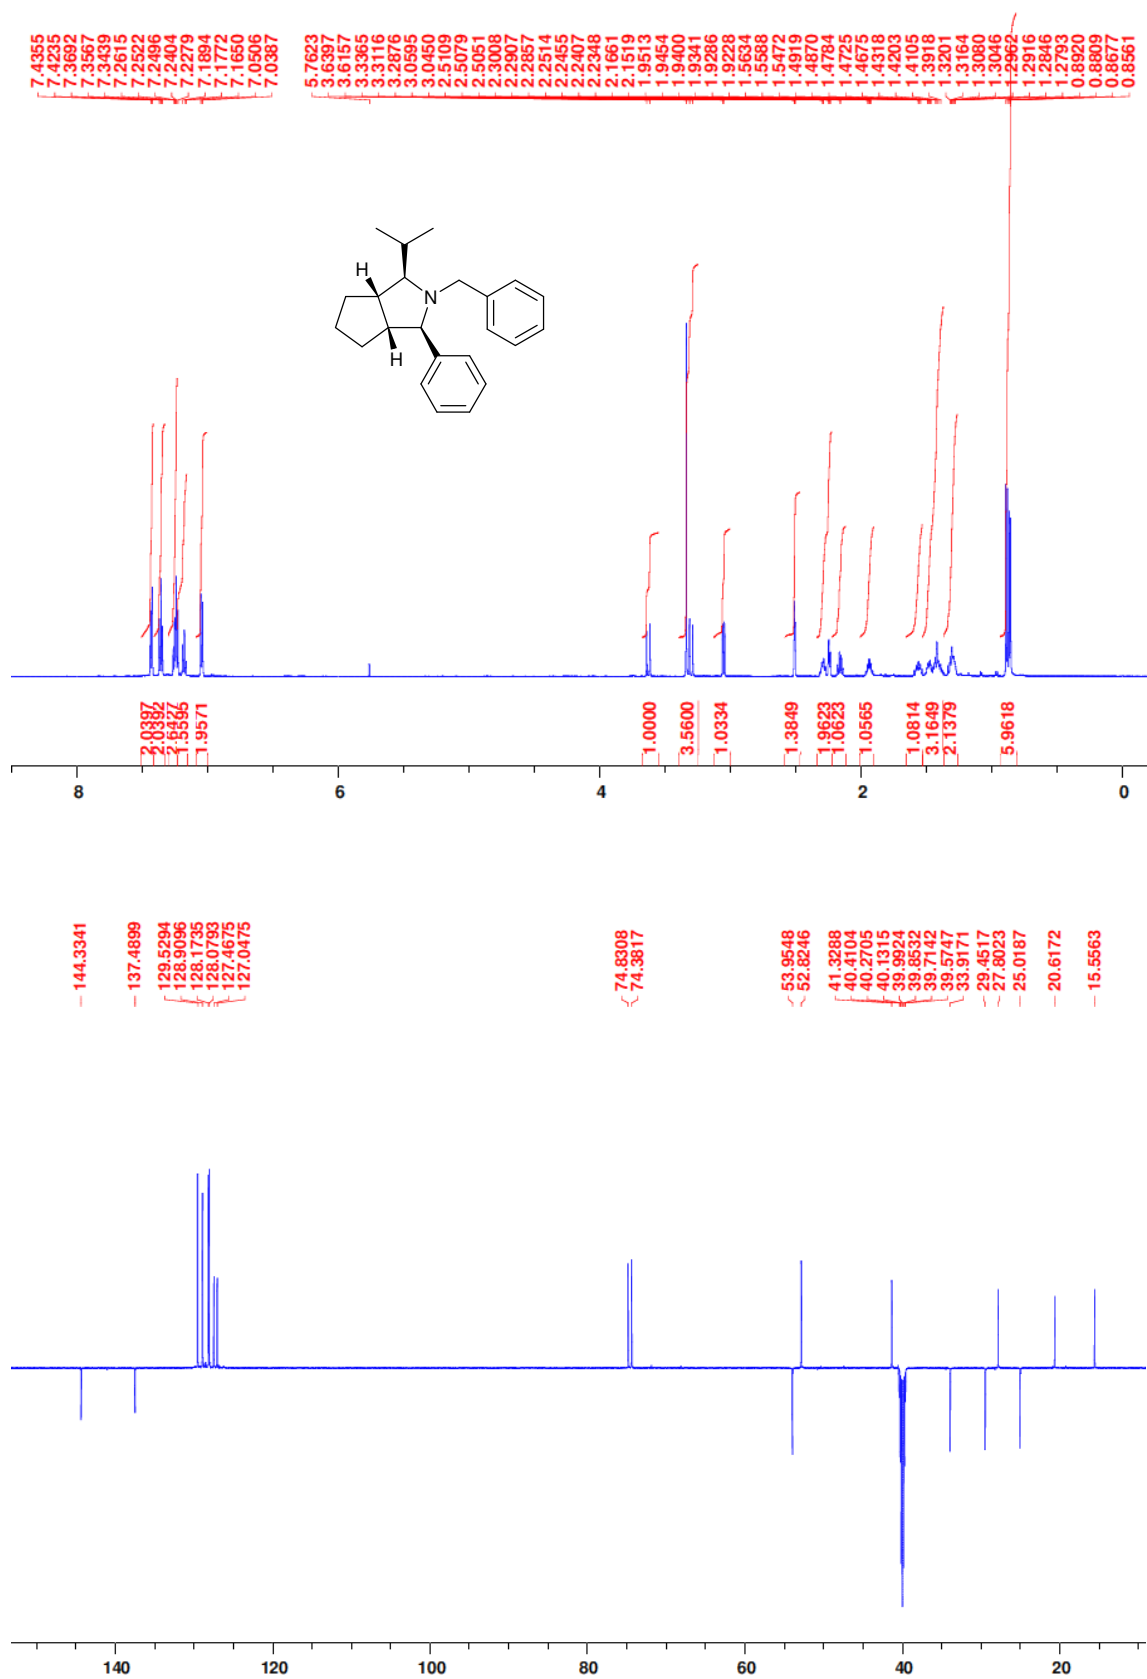

### Compound 21

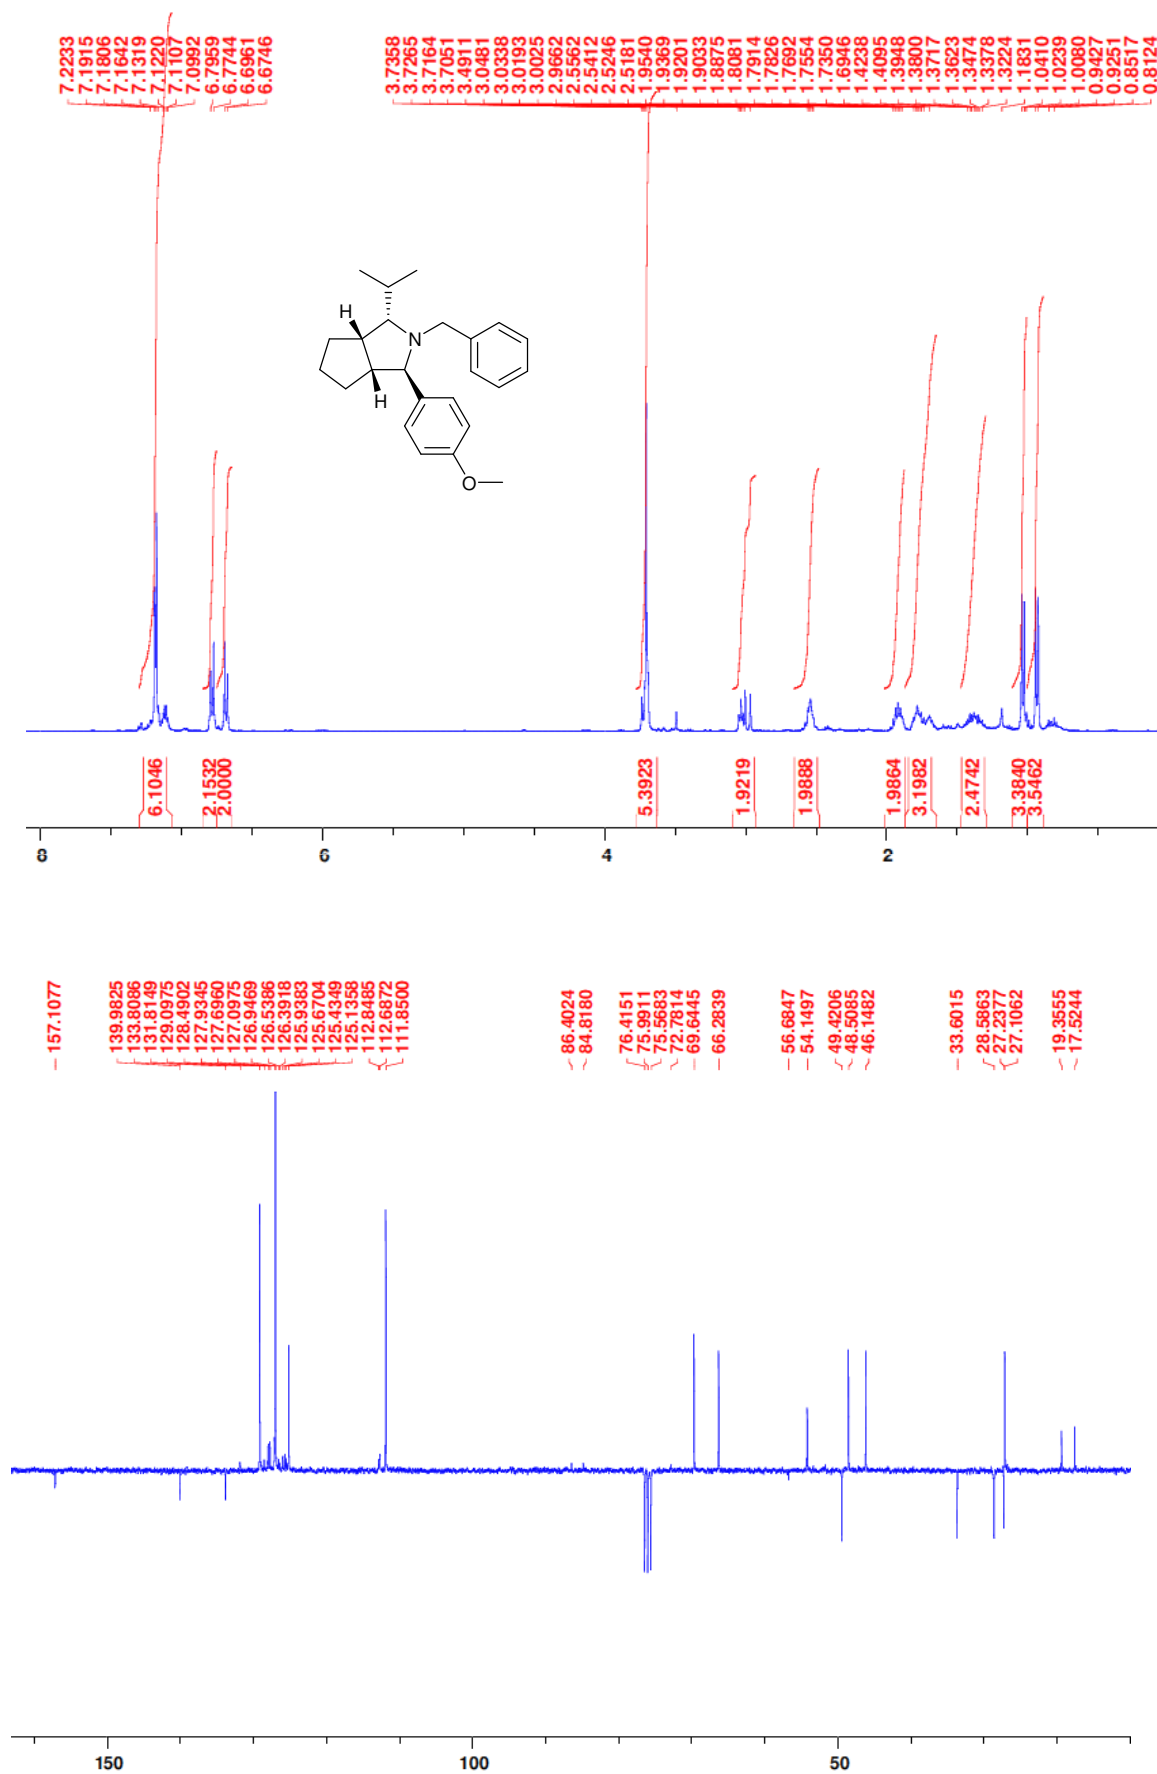

## Compound 22

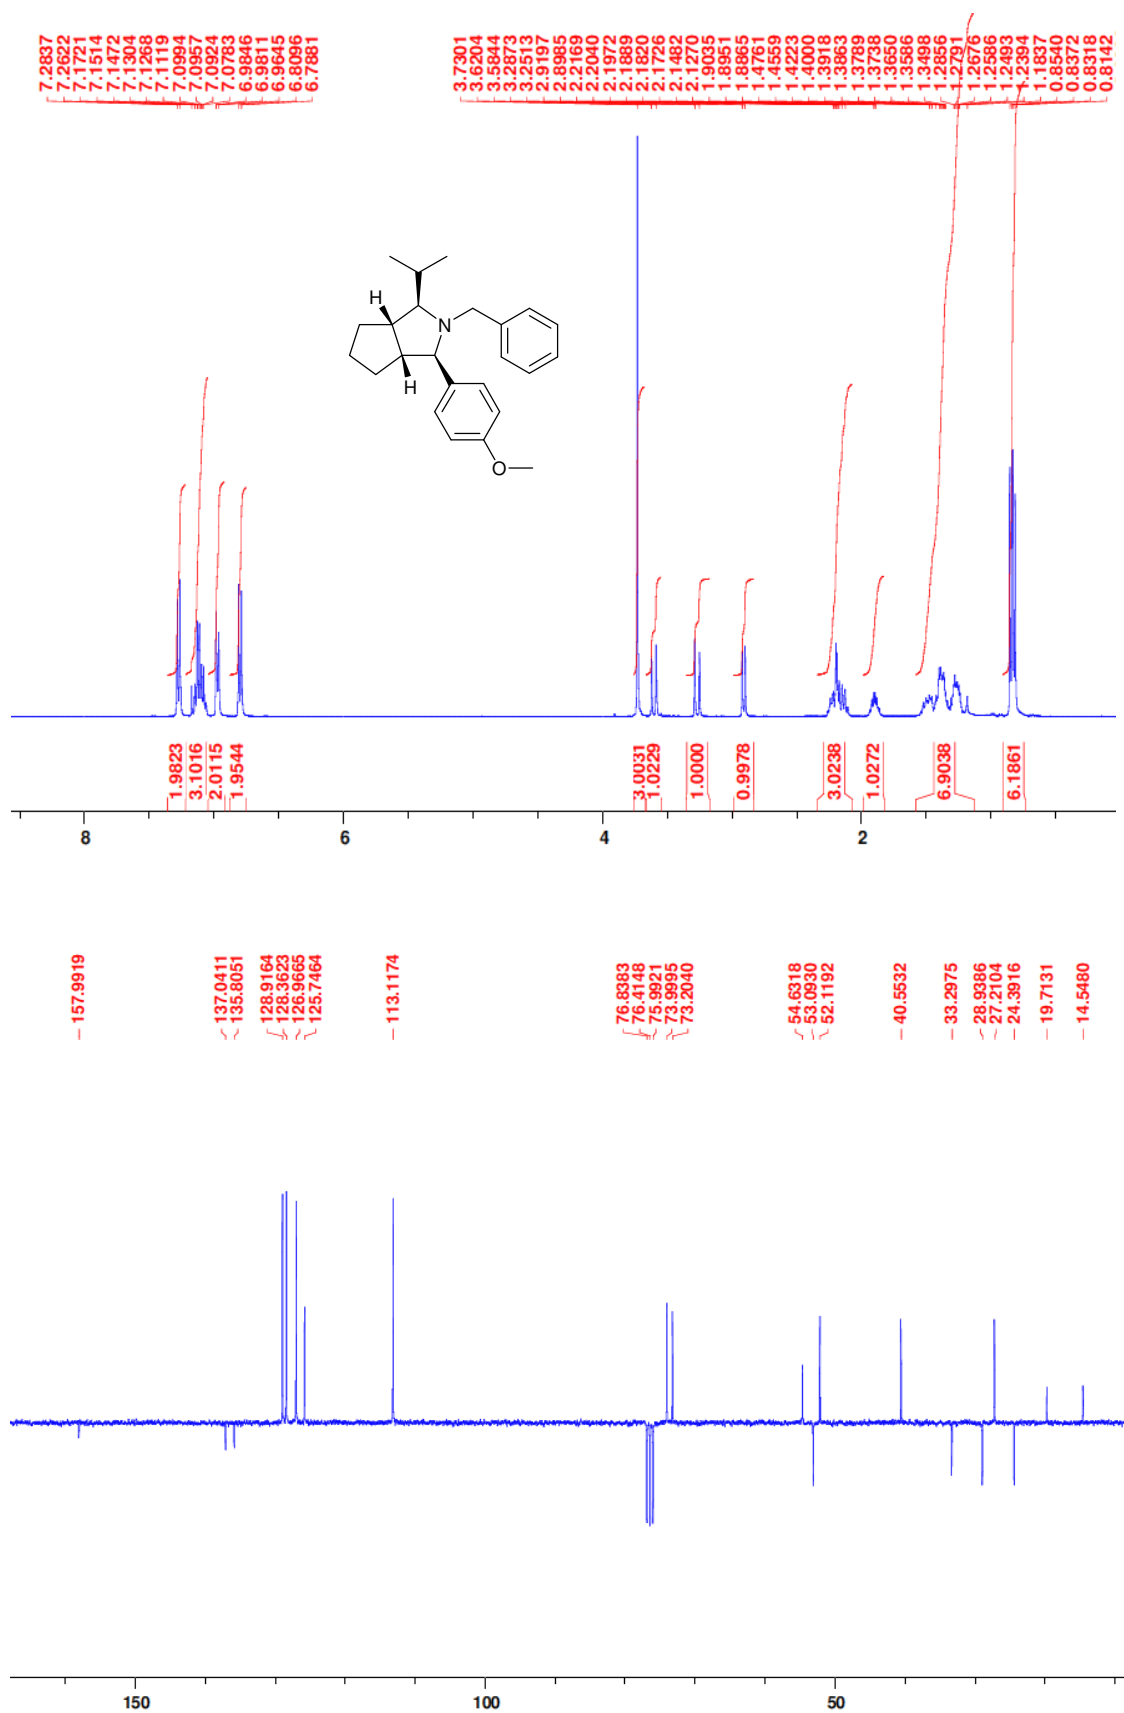

### Compound 23 and 24

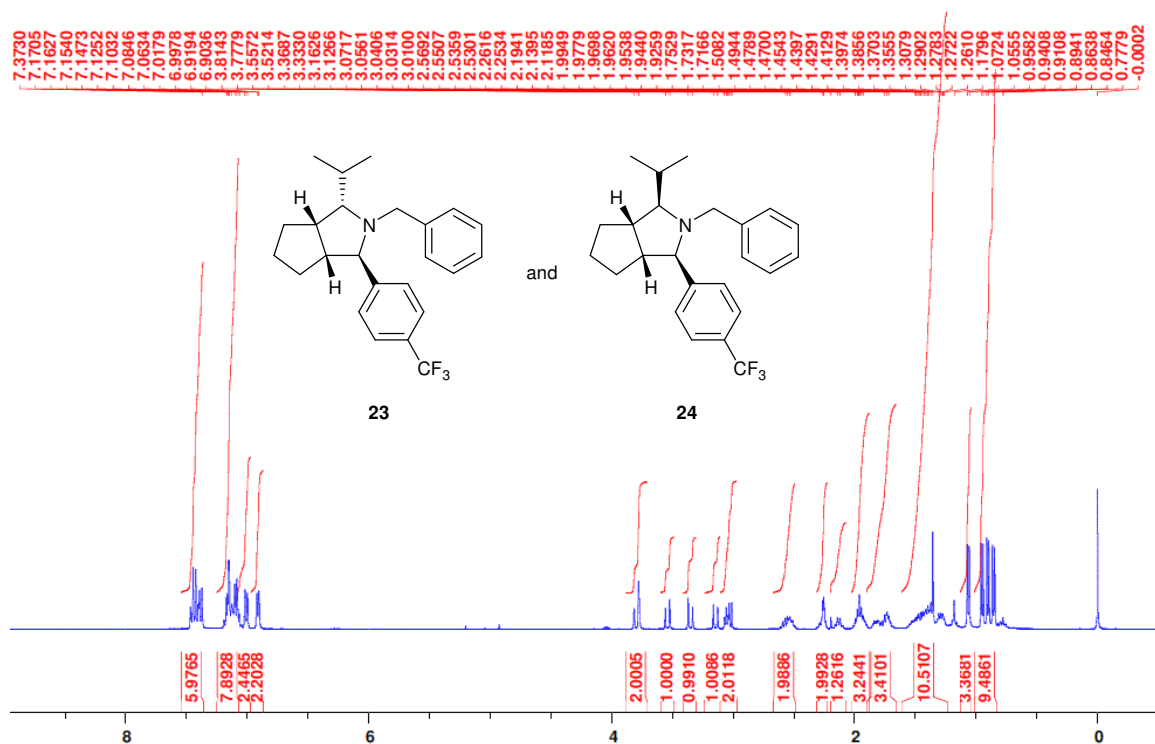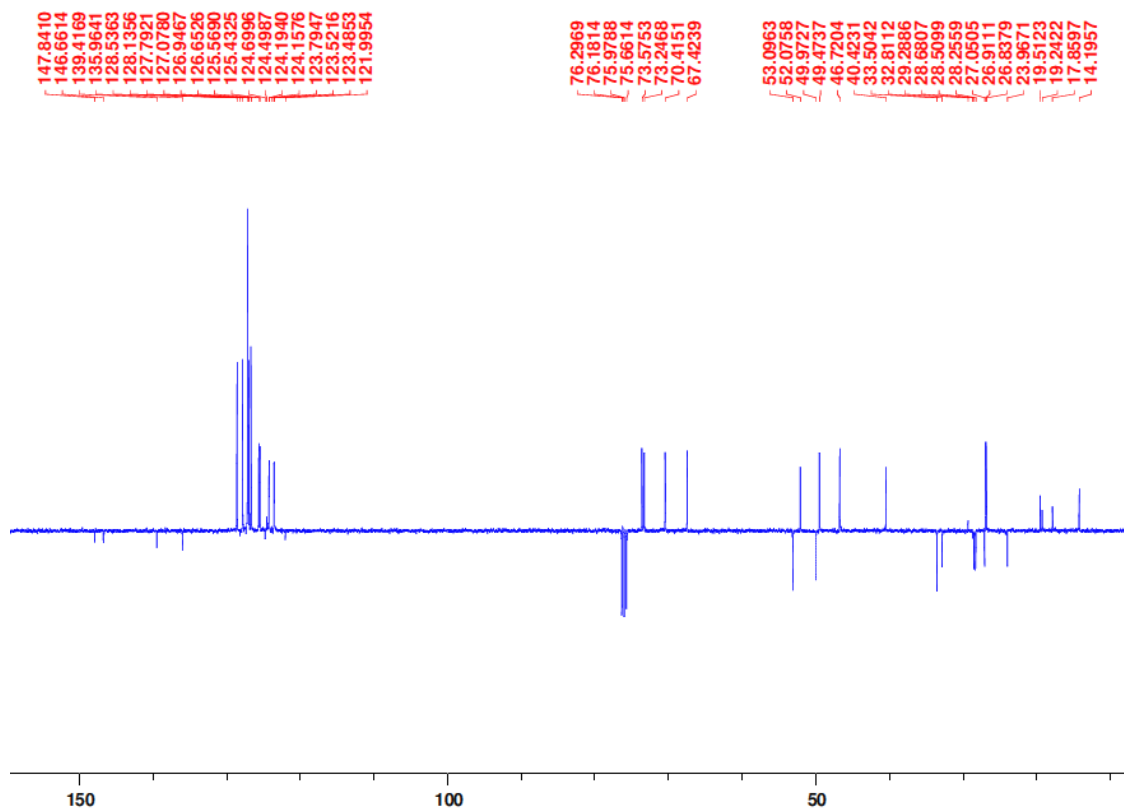

### Compound 26

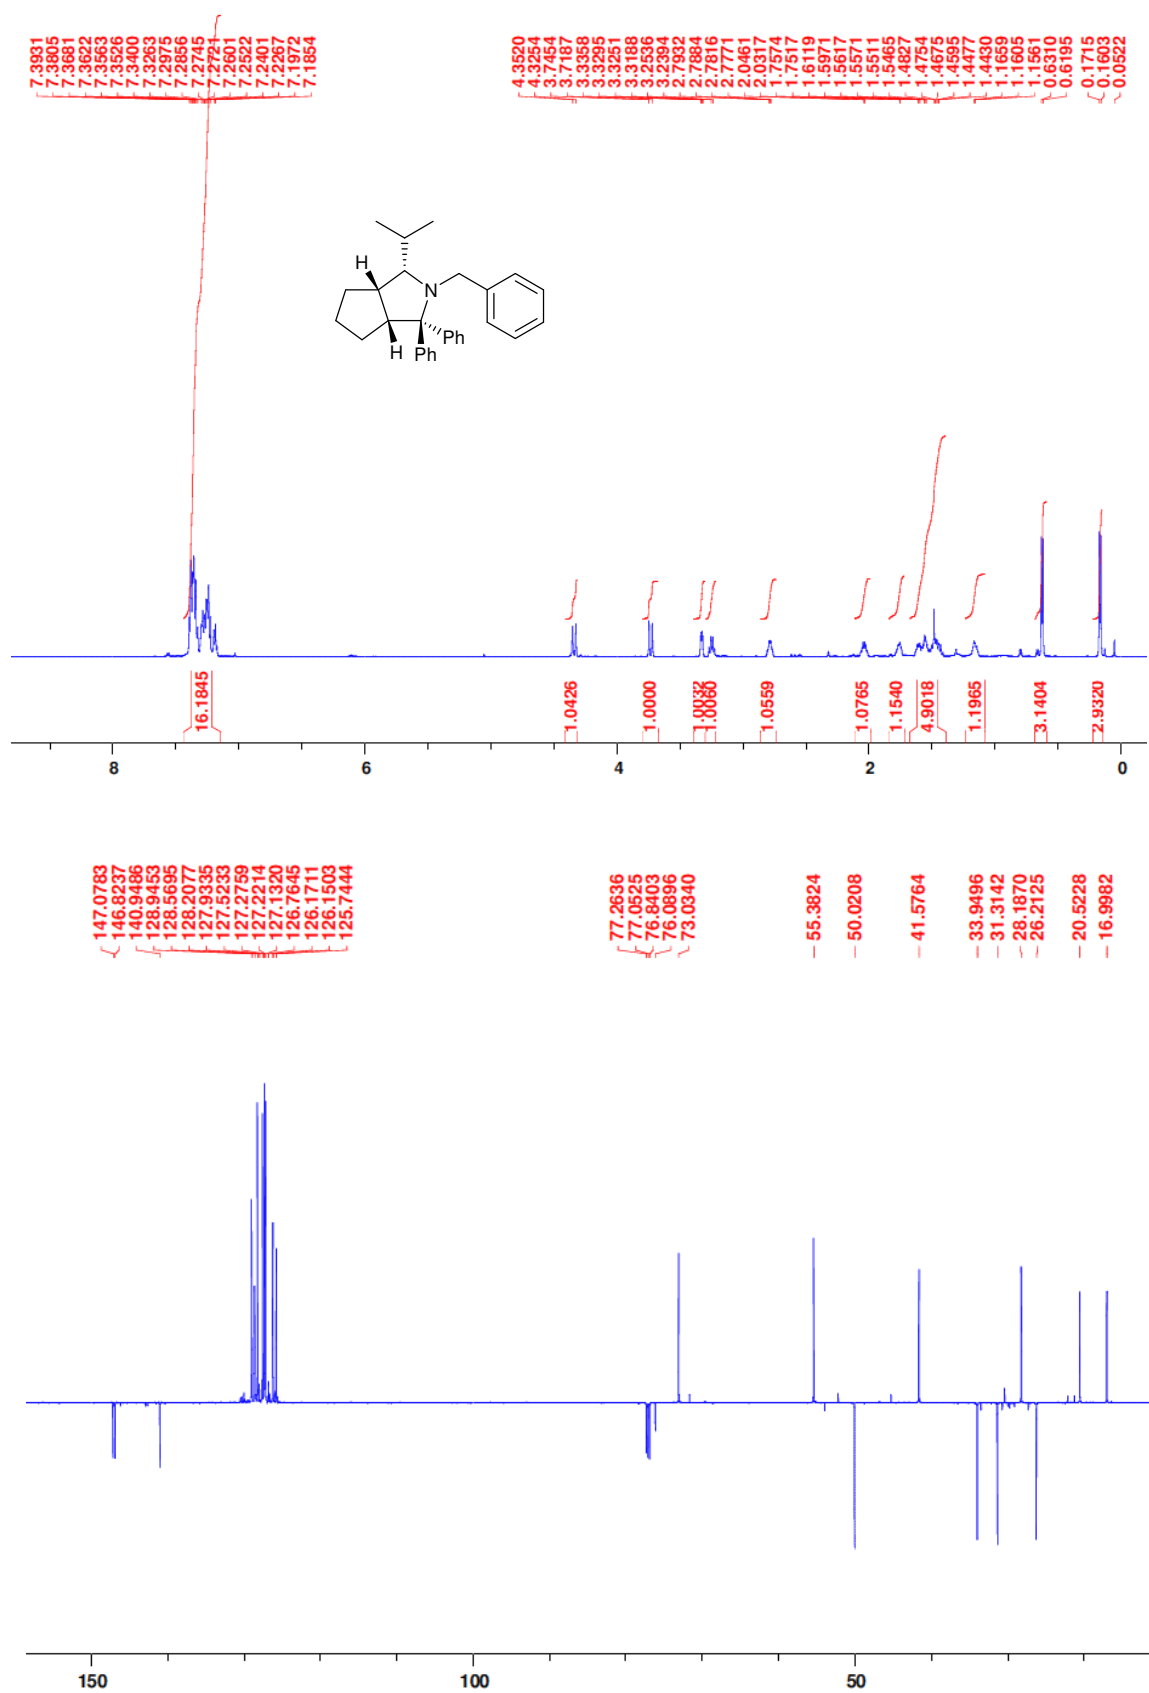

### Compound 27

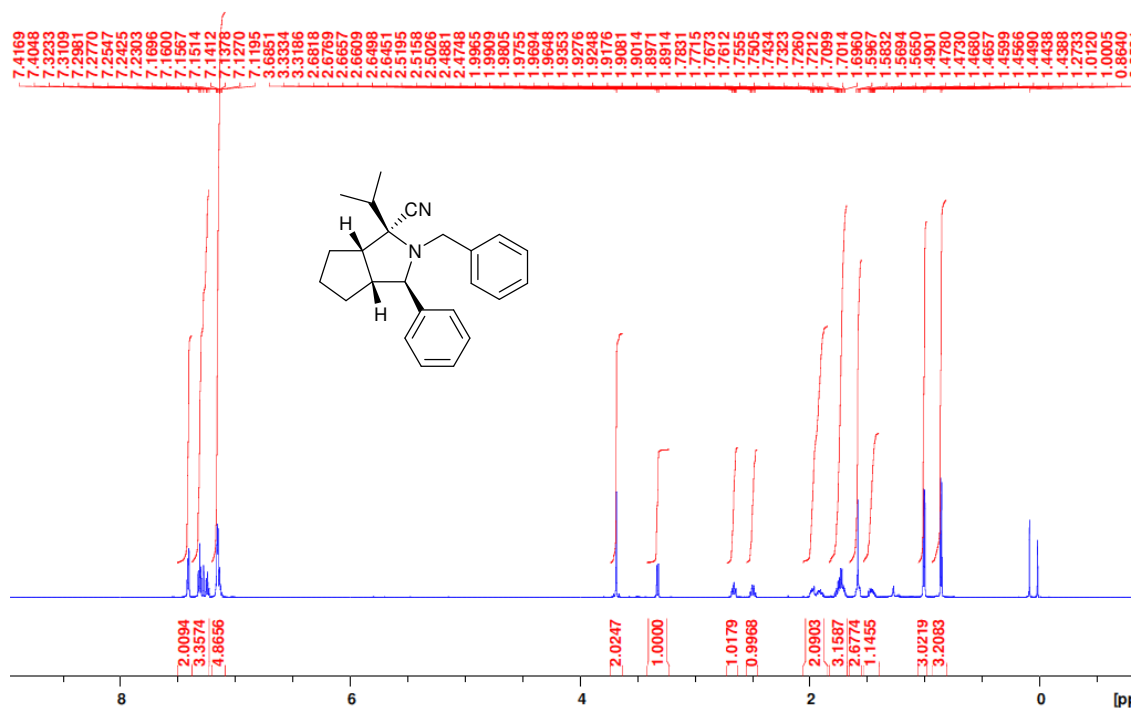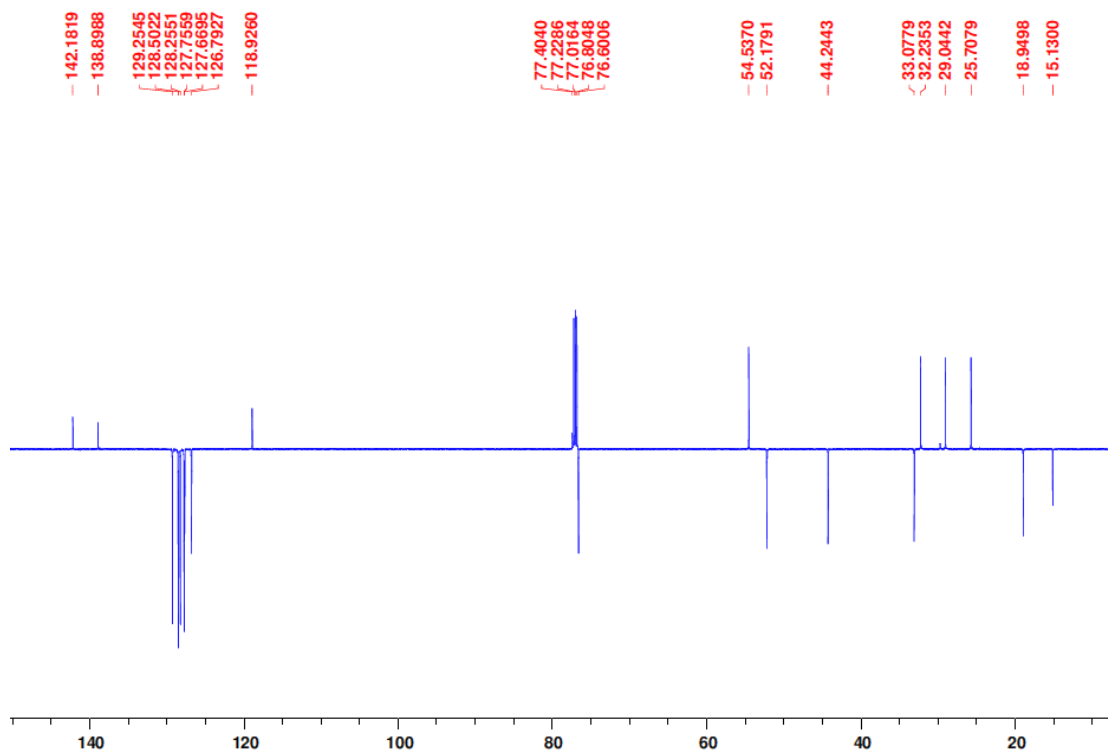



### Compound 31

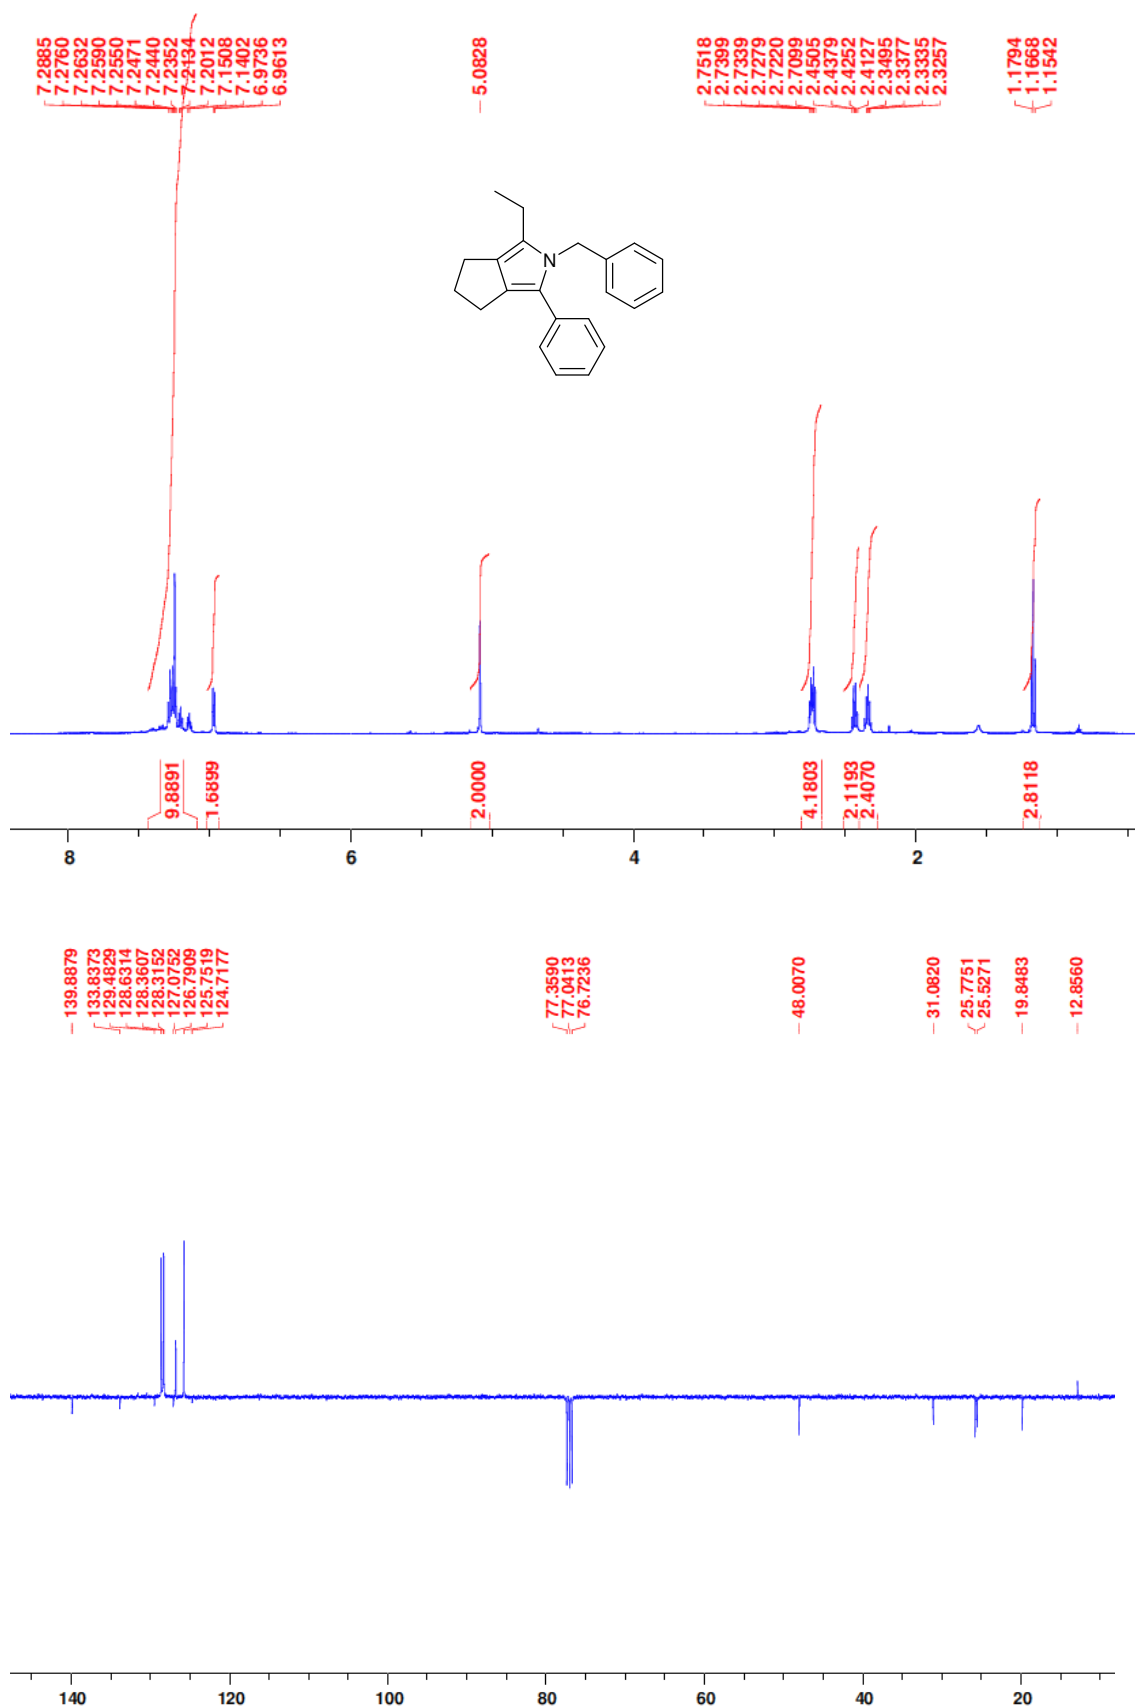

Supplement: c1ob06578e.pdf [file c1ob06578e.pdf]
